# Supplementary material for: Facile dip-coating approach to fabrication of mechanically robust hybrid thin films with high transmittance and durable superhydrophilicity
Source: Royal Society of Chemistry journal article supplement (doi:10.1039/c3ta15363k), 2014-01-01
Supplement: c3ta15363k1.pdf [file c3ta15363k1.pdf]

## Supporting information

for

Facile Dip-coating Approach to Fabrication of Mechanically Robust  
Hybrid Thin Films with High Transmittance and Durable  
Superhydrophilicity

**Lin Yao,<sup>a,b</sup> Junhui He<sup>a,\*</sup>**

<sup>a</sup> *Functional Nanomaterials Laboratory and Key Laboratory of Photochemical Conversion and Optoelectronic Materials, Technical Institute of Physics and Chemistry, Chinese Academy of Sciences, Zhongguancundonglu 29, Haidianqu, Beijing 100190, China*

<sup>b</sup> *University of Chinese Academy of Sciences, Beijing 100049, China*

\* Corresponding author. Fax: +86 10 82543535. E-mail address: [jhhe@mail.ipc.ac.cn](mailto:jhhe@mail.ipc.ac.cn).

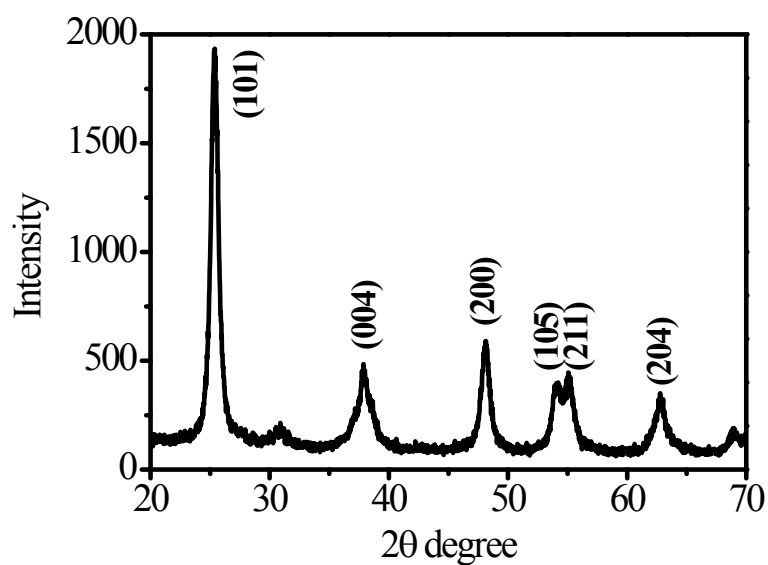

Figure S1. XRD patterns of MTiO<sub>2</sub> powder.

The size of titania nanocrystals was calculated by Scherer's equation:

$$D = k\lambda / \beta \cos\theta$$

Where D is crystallite size, k is a constant of 0.89,  $\lambda$  is X-ray wavelength (0.154184 nm),  $\beta$  is half maximum line breadth, and  $\theta$  is Bragg angle.

Table S1. Atomic percentages of elements revealed by EDS on the top surface of MSiO<sub>2</sub>/MTiO<sub>2</sub> hybrid thin film before and after a sand impact test.

|                         | <b>Ti</b> | <b>Si</b> | <b>O</b> | <b>Na</b> | <b>Ca</b> | <b>Mg</b> | <b>Al</b> |
|-------------------------|-----------|-----------|----------|-----------|-----------|-----------|-----------|
| Before sand impact test | 0.13      | 27.08     | 64.63    | 3.84      | 2.20      | 1.88      | 0.24      |
| After sand impact test  | 0.09      | 27.57     | 62.38    | 5.50      | 2.30      | 1.79      | 0.37      |

### Antifogging test:

Blank glass substrate and the  $\text{MSiO}_2/\text{MTiO}_2$  thin film coated glass substrate were cooled at  $-15\text{ }^\circ\text{C}$  for 3 h in a refrigerator and then exposed to humid laboratory air (relative humidity (RH) : 20–40%) to test their antifogging properties.

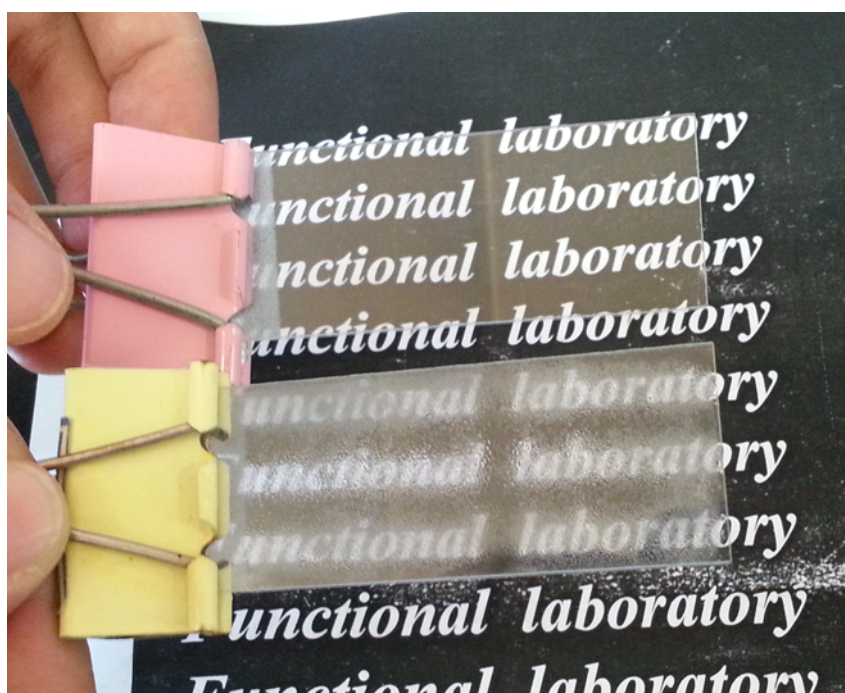

Figure S2. Comparison of the antifogging behaviors of blank glass substrate (lower) and  $\text{MSiO}_2/\text{MTiO}_2$  coated glass substrate after immersion in water for two weeks (upper part).
